# Supplementary material for: Climate Classification System–Based Determination of Temperate Climate Detection of Cryptococcus gattii sensu lato
Source: PubMed Central journal article supplement (PMC6711209; doi:10.3201/eid2509.181884), 2019-09
Supplement: 18-1884-Techapp-s1.pdf [file 18-1884-Techapp-s1.pdf]

# Climate Classification System–Based Determination of Temperate Climate Detection of *Cryptococcus gattii* sensu lato

## Appendix

### Methods for Updated Literature Review

To assess how historical (i.e., pre-1999) areas of *C. gattii* endemicity have been described in the literature, we searched for peer-reviewed English articles published from January 1970 through November 2018 that directly analyzed or reviewed the ecology and/or geographic distribution of *C. gattii*. We searched Google Scholar (<http://scholar.google.com>), ScienceDirect (<http://www.sciencedirect.com>), and Web of Science (<http://thomsonreuters.com/thomson-reuters-web-of-science>). For species, we selected the inputs “either/or” for “*Cryptococcus gattii*,” “*Cryptococcus neoformans* var. *gattii*,” or “*Cryptococcus bacillisporus*” in the search engine, where the last was considered synonymous with *C. gattii* in the late 1970s and early 1980s (1); for ecologic or geographic studies, we selected “either/or” for “ecolog\*,” “geograph\*,” “distribution,” and “niche.” In addition to assessing how historical areas of endemicity of *C. gattii* were described, we also identified which studies were used as the original sources of these statements.

We originally found 105 articles that studied *C. gattii* ecology or geographic distributions, but further narrowed our results down to 73 articles that directly discussed areas of *C. gattii* endemicity before the Vancouver Island outbreak. Articles were classed as “restricted” if they worded *C. gattii* distributions as “restricted to,” “only found in,” or “confined to” (sub)tropical areas, or variations thereof. Articles were classed as “general” if they worded *C. gattii* distributions as “mainly,” “predominantly,” or “primarily” in (sub)tropical areas, or variations thereof.

Of the 73 articles reviewed, 35 studies contained statements claiming *C. gattii* was restricted to the (sub)tropics before the Vancouver Island outbreak (i.e., “restricted” statements),

while 38 studies also acknowledged other historical areas of endemicity outside the (sub)tropics (i.e., “general” statements) (Appendix Figure). The same studies were often cited as the sources of both statements. For example, 2 seminal papers published in 1984 on global *Cryptococcus neoformans* and *C. gattii* distributions (2,3) were primarily or secondarily cited in 24 of the 35 studies making “restricted” statements but were also cited in 10 of the 38 studies making “general” statements. The authors demonstrated a higher prevalence of *C. gattii* in (sub)tropical areas compared to temperate ones but stated the fungus was not entirely restricted to these warmer areas.

## References

1. Kwon-Chung KJ, Bennett JE, Theodore TS. *Cryptococcus bacillisporus* sp. nov.: serotype B-C of *Cryptococcus neoformans*. Int J Syst Evol Microbiol. 1978;28:616–20. <https://doi.org/10.1099/00207713-28-4-616>
2. Kwon-Chung KJ, Bennett JE. Epidemiologic differences between the two varieties of *Cryptococcus neoformans*. Am J Epidemiol. 1984;120:123–30. [PubMed](https://doi.org/10.1093/oxfordjournals.aje.a113861) <https://doi.org/10.1093/oxfordjournals.aje.a113861>
3. Kwon-Chung KJ, Bennett JE. High prevalence of *Cryptococcus neoformans* var. *gattii* in tropical and subtropical regions. Zentralbl Bakteriol Mikrobiol Hyg A. 1984;257:213–8. [PubMed](https://doi.org/10.1016/S0378-5122(84)25701-8)
4. Ellis DH, Pfeiffer TJ. Natural habitat of *Cryptococcus neoformans* var. *gattii*. J Clin Microbiol. 1990;28:1642–4. [PubMed](https://doi.org/10.1093/ajcp/28.1642-4)
5. Sorrell TC, Chen SCA, Ruma P, Meyer W, Pfeiffer TJ, Ellis DH, et al. Concordance of clinical and environmental isolates of *Cryptococcus neoformans* var. *gattii* by random amplification of polymorphic DNA analysis and PCR fingerprinting. J Clin Microbiol. 1996;34:1253–60. [PubMed](https://doi.org/10.1093/ajcp/34.1253-60)
6. Halliday CL, Bui T, Krockenberger M, Malik R, Ellis DH, Carter DA. Presence of  $\alpha$  and **a** mating types in environmental and clinical collections of *Cryptococcus neoformans* var. *gattii* strains from Australia. J Clin Microbiol. 1999;37:2920–6. [PubMed](https://doi.org/10.1093/ajcp/37.2920-6)
7. Pfeiffer T, Ellis D. Environmental isolation of *Cryptococcus neoformans gattii* from California. J Infect Dis. 1991;163:929–30. [PubMed](https://doi.org/10.1093/infdis/163.4.929) <https://doi.org/10.1093/infdis/163.4.929>
8. Pfeiffer TJ, Ellis DH. Environmental isolation of *Cryptococcus neoformans* var. *gattii* from *Eucalyptus tereticornis*. J Med Vet Mycol. 1992;30:407–8. [PubMed](https://doi.org/10.1080/02681219280000541) <https://doi.org/10.1080/02681219280000541>

9. Lazera MS, Wanke B, Nishikawa MM. Isolation of both varieties of *Cryptococcus neoformans* from saprophytic sources in the city of Rio de Janeiro, Brazil. *J Med Vet Mycol.* 1993;31:449–54. <https://doi.org/10.1080/02681219380000581>
10. Lazéra MS, Cavalcanti MAS, Trilles L, Nishikawa MM, Wanke B. *Cryptococcus neoformans* var. *gattii*—evidence for a natural habitat related to decaying wood in a pottery tree hollow. *Med Mycol.* 1998;36:119–22. [PubMed](#)
11. Lazera MS, Salmito Cavalcanti MA, Londero AT, Trilles L, Nishikawa MM, Wanke B. Possible primary ecological niche of *Cryptococcus neoformans*. *Med Mycol.* 2000;38:379–83. [PubMed](#) <https://doi.org/10.1080/mmy.38.5.379.383>
12. Chakrabarti A, Jatana M, Kumar P, Chatha L, Kaushal A, Padhye AA. Isolation of *Cryptococcus neoformans* var. *gattii* from *Eucalyptus camaldulensis* in India. *J Clin Microbiol.* 1997;35:3340–2. [PubMed](#)
13. Montenegro H, Paula CR. Environmental isolation of *Cryptococcus neoformans* var. *gattii* and *C. neoformans* var. *neoformans* in the city of São Paulo, Brazil. *Med Mycol.* 2000;38:385–90. [PubMed](#) <https://doi.org/10.1080/mmy.38.5.385.390>
14. Montagna MT, Viviani MA, Pulito A, Aralla C, Tortorano AM, Fiore L, et al. *Cryptococcus neoformans* var. *gattii* in Italy. Note II. Environment investigation related to an autochthonous clinical case in Apulia. *J Mycol Med.* 1997;7:93–6.
15. Krockenberger MB, Canfield PJ, Malik R. *Cryptococcus neoformans* in the koala (*Phascolarctos cinereus*): colonization by *C. n.* var. *gattii* and investigation of environmental sources. *Med Mycol.* 2002;40:263–72. [PubMed](#) <https://doi.org/10.1080/mmy.40.3.263.272>
16. Callejas A, Ordoñez N, Rodríguez MC, Castañeda E. First isolation of *Cryptococcus neoformans* var. *gattii*, serotype C, from the environment in Colombia. *Med Mycol.* 1998;36:341–4. [PubMed](#) <https://doi.org/10.1080/02681219880000531>
17. Fortes ST, Lazéra MS, Nishikawa MM, Macedo RCL, Wanke B. First isolation of *Cryptococcus neoformans* var. *gattii* from a native jungle tree in the Brazilian Amazon rainforest. *Mycoses.* 2001;44:137–40. [PubMed](#) <https://doi.org/10.1046/j.1439-0507.2001.00651.x>
18. Mahmoud YAG. First environmental isolation of *Cryptococcus neoformans* var. *neoformans* and var. *gattii* from the Gharbia Governorate, Egypt. *Mycopathologia.* 1999;148:83–6. [PubMed](#) <https://doi.org/10.1023/A:1007166818993>

19. Gugnani HC, Mitchell TG, Litvintseva AP, Lengeler KB, Heitman J, Kumar A, et al. Isolation of *Cryptococcus gattii* and *Cryptococcus neoformans* var. *grubii* from the flowers and bark of *Eucalyptus* trees in India. *Med Mycol.* 2005;43:565–9. [PubMed](#)  
<https://doi.org/10.1080/13693780500160785>
20. Argüero Licea B, Garza Garza D, Flores Urbietta V, Cervantes Olivares RA. Isolation and characterization of *Cryptococcus neoformans* var. *gattii* from samples of *Eucalyptus camaldulensis* in Mexico city [in Spanish]. *Rev Iberoam Micol.* 1999;16:40–2. [PubMed](#)
21. Vilcins I, Krockenberger M, Agus H, Carter D. Environmental sampling for *Cryptococcus neoformans* var. *gattii* from the Blue Mountains National Park, Sydney, Australia. *Med Mycol.* 2002;40:53–60. [PubMed](#) <https://doi.org/10.1080/mmy.40.1.53.60>
22. Davel G, Abrantes R, Brudny M, Córdoba S, Rodero L, Canteros CE, et al. First environmental isolation of *Cryptococcus neoformans* var. *gattii* in Argentina [in Spanish]. *Rev Argent Microbiol.* 2003;35:110–2. [PubMed](#)
23. Refojo N, Perrotta D, Brudny M, Abrantes R, Hevia AI, Davel G. Isolation of *Cryptococcus neoformans* and *Cryptococcus gattii* from trunk hollows of living trees in Buenos Aires City, Argentina. *Med Mycol.* 2009;47:177–84. [PubMed](#) <https://doi.org/10.1080/13693780802227290>
24. Kidd SE, Chow Y, Mak S, Bach PJ, Chen H, Hingston AO, et al. Characterization of environmental sources of the human and animal pathogen *Cryptococcus gattii* in British Columbia, Canada, and the Pacific Northwest of the United States. *Appl Environ Microbiol.* 2007;73:1433–43. [PubMed](#)  
<https://doi.org/10.1128/AEM.01330-06>
25. Kidd SE, Hagen F, Tschärke RL, Huynh M, Bartlett KH, Fyfe M, et al. A rare genotype of *Cryptococcus gattii* caused the cryptococcosis outbreak on Vancouver Island (British Columbia, Canada). *Proc Natl Acad Sci U S A.* 2004;101:17258–63. [PubMed](#)  
<http://dx.doi.org/10.1073/pnas.0402981101>
26. Escandón P, Sánchez A, Martínez M, Meyer W, Castañeda E. Molecular epidemiology of clinical and environmental isolates of the *Cryptococcus neoformans* species complex reveals a high genetic diversity and the presence of the molecular type VGII mating type a in Colombia. *FEMS Yeast Res.* 2006;6:625–35. [PubMed](#) <https://doi.org/10.1111/j.1567-1364.2006.00055.x>
27. Nawange SR, Shakya K, Naidu J, Singh SM, Jharia N, Garg S. Decayed wood inside hollow trunks of living trees of *Tamarindus indica*, *Syzygium cumini*, and *Mangifera indica* as natural habitat of

- Cryptococcus neoformans* and their serotypes in Jabalpur City of Central India. *J Mycol Med.* 2006;16:63–71. <https://doi.org/10.1016/j.mycmed.2006.02.004>
28. Kidd SE, Sorrell TC, Meyer W. Isolation of two molecular types of *Cryptococcus neoformans* var. *gattii* from insect frass. *Med Mycol.* 2003;41:171–6. [PubMed https://doi.org/10.1080/714858208](https://pubmed.ncbi.nlm.nih.gov/14858208/)
29. Escandón P, Quintero E, Granados D, Huérfano S, Ruiz A, Castañeda E. Isolation of *Cryptococcus gattii* serotype B from detritus of *Eucalyptus* trees in Colombia [in Spanish]. *Biomedica.* 2005;25:390–7. [PubMed https://doi.org/10.7705/biomedica.v25i3.1363](https://pubmed.ncbi.nlm.nih.gov/1363/)
30. Kidd SE, Guo H, Bartlett KH, Xu J, Kronstad JW. Comparative gene genealogies indicate that two clonal lineages of *Cryptococcus gattii* in British Columbia resemble strains from other geographical areas. *Eukaryot Cell.* 2005;4:1629–38. [PubMed https://doi.org/10.1128/EC.4.10.1629-1638.2005](https://pubmed.ncbi.nlm.nih.gov/1629-38/)
31. Mazza M, Refojo N, Bosco-Borgeat ME, Taverna CG, Trovero AC, Rogé A, et al. *Cryptococcus gattii* in urban trees from cities in North-eastern Argentina. *Mycoses.* 2013;56:646–50. [PubMed https://doi.org/10.1111/myc.12084](https://pubmed.ncbi.nlm.nih.gov/12084/)
32. Barbosa GG, Trilles L, Wanke B, Lazera MD. *Cryptococcus gattii* VGI and *Cryptococcus neoformans* VNI associated with wood decay in *Ficus* hollow trees in Rio de Janeiro, Brazil. *Br Microbiol Res J.* 2013;3:106–15. <https://doi.org/10.9734/BMRJ/2013/2682>
33. Firacative C, Torres G, Rodríguez MC, Escandón P. First environmental isolation of *Cryptococcus gattii* serotype B, from Cúcuta, Colombia [in Spanish]. *Biomedica.* 2011;31:118–23. [PubMed https://doi.org/10.7705/biomedica.v31i1.342](https://pubmed.ncbi.nlm.nih.gov/342/)
34. Costa SP, Lazéra MS, Santos WRA, Morales BP, Bezerra CCF, Nishikawa MM, et al. First isolation of *Cryptococcus gattii* molecular type VGII and *Cryptococcus neoformans* molecular type VNI from environmental sources in the city of Belém, Pará, Brazil. *Mem Inst Oswaldo Cruz.* 2009;104:662–4. [PubMed https://doi.org/10.1590/S0074-02762009000400023](https://pubmed.ncbi.nlm.nih.gov/400023/)
35. Girish Kumar CP, Prabu D, Mitani H, Mikami Y, Menon T. Environmental isolation of *Cryptococcus neoformans* and *Cryptococcus gattii* from living trees in Guindy National Park, Chennai, South India. *Mycoses.* 2010;53:262–4. [PubMed https://doi.org/10.1111/j.1439-0507.2009.01699.x](https://pubmed.ncbi.nlm.nih.gov/1699.x/)
36. Romeo O, Scordino F, Criseo G. Environmental isolation of *Cryptococcus gattii* serotype B, VGI/MAT $\alpha$  strains in southern Italy. *Mycopathologia.* 2011;171:423–30. [PubMed https://doi.org/10.1007/s11046-010-9389-z](https://pubmed.ncbi.nlm.nih.gov/9389-z/)

37. Loperena-Alvarez Y, Ren P, Li X, Schoonmaker-Bopp DJ, Ruiz A, Chaturvedi V, et al. Genotypic characterization of environmental isolates of *Cryptococcus gattii* from Puerto Rico. *Mycopathologia*. 2010;170:279–85. [PubMed https://doi.org/10.1007/s11046-010-9296-3](https://doi.org/10.1007/s11046-010-9296-3)
38. DeBess E, Lockhart SR, Iqbal N, Cieslak PR. Isolation of *Cryptococcus gattii* from Oregon soil and tree bark, 2010-2011. *BMC Microbiol*. 2014;14:323. [PubMed https://doi.org/10.1186/s12866-014-0323-2](https://doi.org/10.1186/s12866-014-0323-2)
39. Chowdhary A, Randhawa HS, Boekhout T, Hagen F, Klaassen CH, Meis JF. Temperate climate niche for *Cryptococcus gattii* in Northern Europe. *Emerg Infect Dis*. 2012;18:172–4. [PubMed https://doi.org/10.3201/eid1801.111190](https://doi.org/10.3201/eid1801.111190)
40. Mseddi F, Sellami A, Jarboui MA, Sellami H, Makni F, Ayadi A. First environmental isolations of *Cryptococcus neoformans* and *Cryptococcus gattii* in Tunisia and review of published studies on environmental isolations in Africa. *Mycopathologia*. 2011;171:355–60. [PubMed https://doi.org/10.1007/s11046-010-9381-7](https://doi.org/10.1007/s11046-010-9381-7)
41. Springer DJ, Billmyre RB, Filler EE, Voelz K, Pursall R, Mieczkowski PA, et al. *Cryptococcus gattii* VGIII isolates causing infections in HIV/AIDS patients in Southern California: identification of the local environmental source as arboreal. *PLoS Pathog*. 2014;10:e1004285. [PubMed https://doi.org/10.1371/journal.ppat.1004285](https://doi.org/10.1371/journal.ppat.1004285)
42. Chen Y, Litvintseva AP, Frazzitta AE, Haverkamp MR, Wang L, Fang C, et al. Comparative analyses of clinical and environmental populations of *Cryptococcus neoformans* in Botswana. *Mol Ecol*. 2015;24:3559–71. [PubMed https://doi.org/10.1111/mec.13260](https://doi.org/10.1111/mec.13260)
43. Alves GSB, Freire AKL, Bentes AS, Pinheiro JFD, de Souza JVB, Wanke B, et al. Molecular typing of environmental *Cryptococcus neoformans/C. gattii* species complex isolates from Manaus, Amazonas, Brazil. *Mycoses*. 2016;59:509–15. [PubMed https://doi.org/10.1111/myc.12499](https://doi.org/10.1111/myc.12499)
44. Kangogo M, Bader O, Boga H, Wanyoike W, Folba C, Worasilchai N, et al. Molecular types of *Cryptococcus gattii/Cryptococcus neoformans* species complex from clinical and environmental sources in Nairobi, Kenya. *Mycoses*. 2015;58:665–70. [PubMed https://doi.org/10.1111/myc.12411](https://doi.org/10.1111/myc.12411)
45. Colom MF, Hagen F, Gonzalez A, Mellado A, Morera N, Linares C, et al. *Ceratonia siliqua* (carob) trees as natural habitat and source of infection by *Cryptococcus gattii* in the Mediterranean environment. *Med Mycol*. 2012;50:67–73. [PubMed https://doi.org/10.3109/13693786.2011.574239](https://doi.org/10.3109/13693786.2011.574239)

46. Hagen F, Chowdhary A, Prakash A, Yntema J-B, Meis JF. Molecular characterization of *Cryptococcus gattii* genotype AFLP6/VGII isolated from woody debris of divi-divi (*Caesalpinia coriaria*), Bonaire, Dutch Caribbean. *Rev Iberoam Micol.* 2014;31:193–6. [PubMed](#)  
<https://doi.org/10.1016/j.riam.2013.10.007>
47. Cogliati M, D’Amicis R, Zani A, Montagna MT, Caggiano G, De Giglio O, et al. Environmental distribution of *Cryptococcus neoformans* and *C. gattii* around the Mediterranean basin. *FEMS Yeast Res.* 2016;16:fow045. [PubMed](#) <https://doi.org/10.1093/femsyr/fow045>
48. Linares C, Colom MF, Torreblanca M, Esteban V, Romera Á, Hagen F. Environmental sampling of *Ceratonia siliqua* (carob) trees in Spain reveals the presence of the rare *Cryptococcus gattii* genotype AFLP7/VGIV. *Rev Iberoam Micol.* 2015;32:269–72. [PubMed](#)  
<https://doi.org/10.1016/j.riam.2014.11.002>
49. Brito-Santos F, Barbosa GG, Trilles L, Nishikawa MM, Wanke B, Meyer W, et al. Environmental isolation of *Cryptococcus gattii* VGII from indoor dust from typical wooden houses in the deep Amazonas of the Rio Negro basin. *PLoS One.* 2015;10:e0115866. [PubMed](#)  
<https://doi.org/10.1371/journal.pone.0115866>
50. Khayhan K, Hagen F, Norkaew T, Puengchan T, Boekhout T, Sriburee P. Isolation of *Cryptococcus gattii* from a *Castanopsis argyrophylla* tree hollow (Mai-Kaw), Chiang Mai, Thailand. *Mycopathologia.* 2017;182:365–70. [PubMed](#) <https://doi.org/10.1007/s11046-016-0067-7>
51. Hagen F, Khayhan K, Theelen B, Kolecka A, Polacheck I, Sionov E, et al. Recognition of seven species in the *Cryptococcus gattii*/*Cryptococcus neoformans* species complex. *Fungal Genet Biol.* 2015;78:16–48. [PubMed](#) <https://doi.org/10.1016/j.fgb.2015.02.009>
52. Nordlohne E. The Netherlands Antilles. *Revista Geografica.* 1958;23:103–10.
53. Peel MC, Finlayson BL, McMahon TA. Updated world map of the Köppen-Geiger climate classification. *Hydrol Earth Syst Sci.* 2007;11:1633–44. <https://doi.org/10.5194/hess-11-1633-2007>

**Appendix Table.** Unique georeferenced global environmental isolations of *Cryptococcus gattii* (n = 83) listed in chronologic order, 1989–2016\*

| Country       | Area                                                 | Sample year(s) | Longitude | Latitude | Earliest year | Genotype                 | Mating type         | Species                                          | With ±40° limits | With ±35° limits | KG label | KG limits | Ref. |
|---------------|------------------------------------------------------|----------------|-----------|----------|---------------|--------------------------|---------------------|--------------------------------------------------|------------------|------------------|----------|-----------|------|
| Australia     | Balranald, NSW                                       | 1989           | 143.5633  | -34.6394 | 1989          | –                        | –                   | –                                                | ST               | ST               | Bsk      | AR        | (4)  |
| Australia     | Balranald, NSW                                       | 1989–1990      | 143.5633  | -34.6394 | 1989          | AFLP4B/VGIb              | –                   | <i>C. gattii</i> s.s.                            | ST               | ST               | Bsk      | AR        | (5)  |
| Australia     | Balranald, NSW                                       | 1989–1996      | 143.5633  | -34.6394 | 1989          | AFLP4/VGI                | $\alpha$ , <b>a</b> | <i>C. gattii</i> s.s.                            | ST               | ST               | Bsk      | AR        | (6)  |
| Australia     | Hay, NSW                                             | 1989           | 144.5803  | -34.1573 | 1989          | –                        | –                   | –                                                | ST               | ST               | Bsk      | AR        | (4)  |
| Australia     | Hay, NSW                                             | 1989–1990      | 144.5803  | -34.1573 | 1989          | AFLP4/VGI                | $\alpha$            | <i>C. gattii</i> s.s.                            | ST               | ST               | Bsk      | AR        | (6)  |
| Australia     | Barossa Valley (Barossa Reservoir and Nuriootpa), SA | 1989           | 138.95    | -34.5333 | 1989          | –                        | –                   | –                                                | ST               | ST               | Csa      | TM        | (4)  |
| Australia     | Barossa Valley, SA                                   | 1989–1992      | 138.95    | -34.5333 | 1989          | AFLP4A/VGIa              | –                   | <i>C. gattii</i> s.s.                            | ST               | ST               | Csa      | TM        | (5)  |
| United States | Fort Point, San Francisco, California                | 1990           | -122.477  | 37.81022 | 1990          | AFLP6A/VGIIa             | –                   | <i>C. deuterogattii</i>                          | ST               | TM               | Csb      | TM        | (7)  |
| Australia     | Tocumwal, NSW                                        | 1991           | 145.569   | -35.8122 | 1991          | AFLP4/VGI                | –                   | <i>C. gattii</i> s.s.                            | ST               | TM               | Bsk      | AR        | (5)  |
| Australia     | Currumbin, Gold Coast, QLD                           | 1991           | 153.4667  | -28.1333 | 1991          | –                        | –                   | –                                                | ST               | ST               | Cfa      | TM        | (8)  |
| Australia     | Currumbin, Gold Coast, QLD                           | 1991–1993      | 153.4667  | -28.1333 | 1991          | AFLP4/VGI                | –                   | <i>C. gattii</i> s.s.                            | ST               | ST               | Cfa      | TM        | (5)  |
| Australia     | Mt. Annan, Greater Sydney, NSW                       | 1991           | 150.7598  | -34.0529 | 1991          | –                        | –                   | –                                                | ST               | ST               | Cfb      | TM        | (8)  |
| Australia     | Mt. Annan, Greater Sydney, NSW                       | 1991–1994      | 150.7598  | -34.0529 | 1991          | AFLP4/VGI                | –                   | <i>C. gattii</i> s.s.                            | ST               | ST               | Cfb      | TM        | (5)  |
| Australia     | Busselton, WA                                        | 1993           | 115.3708  | -33.6848 | 1993          | AFLP6/VGII               | –                   | <i>C. deuterogattii</i>                          | ST               | ST               | Csb      | TM        | (5)  |
| Brazil        | Rio de Janeiro                                       | <1993          | -43.16667 | -22.9    | 1993          | AFLP4/VGI                | –                   | <i>C. gattii</i> s.s.                            | T                | T                | Am       | T         | (9)  |
| Brazil        | Teresina                                             | 1993           | -42.8485  | -5.30175 | 1993          | AFLP6/VGII               | $\alpha$            | <i>C. deuterogattii</i>                          | T                | T                | Aw       | T         | (10) |
| Brazil        | Teresina                                             | 1993–1997      | -42.8485  | -5.30175 | 1993          | AFLP6/VGII               | $\alpha$            | <i>C. deuterogattii</i>                          | T                | T                | Aw       | T         | (11) |
| India         | Ferozepur                                            | 1995–1996      | 74.56     | 30.89    | 1995          | –                        | –                   | –                                                | ST               | ST               | BSh      | AR        | (12) |
| Australia     | Gold Coast, QLD                                      | 1996           | 153.4309  | -28.0003 | 1996          | AFLP4/VGI                | $\alpha$            | <i>C. gattii</i> s.s.                            | ST               | ST               | Cfa      | TM        | (6)  |
| Australia     | Adelaide, SA                                         | 1996           | 138.5986  | -34.9287 | 1996          | AFLP4/VGI                | $\alpha$            | <i>C. gattii</i> s.s.                            | ST               | ST               | Csa      | TM        | (6)  |
| Brazil        | Ibirapuera Park, Sao Paulo                           | 1996–1997      | -46.6581  | -23.6022 | 1996          | –                        | –                   | –                                                | ST               | ST               | Cfa      | TM        | (13) |
| Italy         | Apulia                                               | 1996           | 16.619    | 40.985   | 1996          | –                        | –                   | –                                                | TM               | TM               | Cfa      | TM        | (14) |
| United States | San Diego Zoo area, San Diego, California            | <1996          | -117.157  | 32.71533 | 1996          | AFLP4/VGI<br>AFLP5/VGIII | –                   | <i>C. gattii</i> s.s.<br><i>C. bacillisporus</i> | ST               | ST               | Bsk      | AR        | (5)  |
| Australia     | Coffs Harbour, NSW                                   | 1997–2000      | 153.10    | -30.30   | 1997          | –                        | $\alpha$            | –                                                | ST               | ST               | Cfa      | TM        | (15) |
| Australia     | Port Macquarie, NSW                                  | 1997–2000      | 152.92    | -31.44   | 1997          | –                        | $\alpha$            | –                                                | ST               | ST               | Cfa      | TM        | (15) |
| Australia     | St. Ives, Sydney, NSW                                | 1997–1998      | 151.1667  | -33.7333 | 1997          | AFLP4/VGI                | $\alpha$            | <i>C. gattii</i> s.s.                            | ST               | ST               | Cfa      | TM        | (6)  |
| Australia     | Eastern Sydney, NSW                                  | 1997–2000      | 151.20    | -33.86   | 1997          | –                        | $\alpha$ , <b>a</b> | –                                                | ST               | ST               | Cfa      | TM        | (15) |
| Colombia      | Cúcuta                                               | 1997           | -72.5     | 7.9      | 1997          | –                        | –                   | –                                                | T                | T                | Am       | T         | (16) |
| Australia     | Renmark, SA                                          | 1998           | 140.747   | -34.177  | 1998          | AFLP4/VGI                | $\alpha$ , <b>a</b> | <i>C. gattii</i> s.s.                            | ST               | ST               | Bsk      | AR        | (6)  |
| Australia     | Breeza, NSW                                          | 1998           | 150.4667  | -31.25   | 1998          | AFLP4/VGI                | $\alpha$            | <i>C. gattii</i> s.s.                            | ST               | ST               | Cfa      | TM        | (6)  |
| Australia     | Pilliga, NSW                                         | 1998           | 148.9     | -30.35   | 1998          | AFLP4/VGI                | $\alpha$            | <i>C. gattii</i> s.s.                            | ST               | ST               | Cfa      | TM        | (6)  |
| Australia     | Port Macquarie, NSW                                  | 1998           | 152.9167  | -31.4167 | 1998          | AFLP4/VGI                | $\alpha$            | <i>C. gattii</i> s.s.                            | ST               | ST               | Cfa      | TM        | (6)  |
| Brazil        | Ilha de Maracá                                       | 1998–1999      | -61.6667  | 3.41667  | 1998          | AFLP6/VGII               | <b>a</b>            | <i>C. deuterogattii</i>                          | T                | T                | Am       | T         | (17) |
| Egypt         | Qutur and Tanta areas, Gharbia Governorate           | 1998           | 30.95614  | 30.97225 | 1998          | –                        | –                   | –                                                | ST               | ST               | BWh      | AR        | (18) |
| India         | Delhi (northwestern India)                           | 1999–2000      | 77.22897  | 28.65381 | 1999          | –                        | –                   | –                                                | ST               | ST               | BSh      | AR        | (19) |
| Mexico        | Mexico City                                          | <1999          | -99.1277  | 19.42847 | 1999          | –                        | –                   | –                                                | T                | T                | Cwb      | TM        | (20) |
| Australia     | Glenbrook, Blue Mountains National Park, Sydney      | 2000           | 150.4731  | -33.6562 | 2000          | AFLP4/VGI                | $\alpha$            | <i>C. gattii</i> s.s.                            | ST               | ST               | Cfb      | TM        | (21) |
| Argentina     | Buenos Aires City                                    | 2001           | -58.3772  | -34.6131 | 2001          | –                        | –                   | –                                                | ST               | ST               | Cfa      | TM        | (22) |



| Country       | Area                                                                                                    | Sample year(s) | Longitude | Latitude | Earliest year | Genotype                       | Mating type          | Species                                          | With $\pm 40^\circ$ limits | With $\pm 35^\circ$ limits | KG label | KG limits | Ref. |
|---------------|---------------------------------------------------------------------------------------------------------|----------------|-----------|----------|---------------|--------------------------------|----------------------|--------------------------------------------------|----------------------------|----------------------------|----------|-----------|------|
| Argentina     | Rep. de Chile Park, de los Patricios Park, Centenario Park, and N. Avellaneda Park in Buenos Aires City | 2002           | -58.3772  | -34.6131 | 2002          | AFLP4/VGI                      | -                    | <i>C. gattii</i> s.s.                            | ST                         | ST                         | Cfa      | TM        | (23) |
| Canada        | Cameron Lake, B.C.                                                                                      | 2002           | -124.619  | 49.29133 | 2002          | AFLP6A/VGIIa                   | -                    | <i>C. deuterogattii</i>                          | TM                         | TM                         | Csb      | TM        | (24) |
| Canada        | Courtenay, B.C.                                                                                         | 2002           | -124.994  | 49.68657 | 2002          | AFLP6A/VGIIa                   | -                    | <i>C. deuterogattii</i>                          | TM                         | TM                         | Csb      | TM        | (24) |
| Canada        | Duncan, B.C.                                                                                            | 2002           | -123.703  | 48.78293 | 2002          | AFLP4/VGI<br>AFLP6B/VGIIb      | -                    | <i>C. gattii</i> s.s.<br><i>C. deuterogattii</i> | TM                         | TM                         | Csb      | TM        | (24) |
| Canada        | MacMillan Park, Cathedral Grove, B.C.                                                                   | 2002           | -124.669  | 49.28293 | 2002          | AFLP6A/VGIIa                   | $\alpha$             | <i>C. deuterogattii</i>                          | TM                         | TM                         | Csb      | TM        | (25) |
| Canada        | Nanaimo, B.C.                                                                                           | 2002           | -123.936  | 49.16634 | 2002          | AFLP6A/VGIIa                   | -                    | <i>C. deuterogattii</i>                          | TM                         | TM                         | Csb      | TM        | (24) |
| Canada        | Parksville, B.C.                                                                                        | 2002           | -124.314  | 49.32    | 2002          | AFLP6A/VGIIa                   | -                    | <i>C. deuterogattii</i>                          | TM                         | TM                         | Csb      | TM        | (24) |
| Canada        | Port Alberni, B.C.                                                                                      | 2002           | -124.808  | 49.234   | 2002          | AFLP6A/VGIIa,<br>AFLP6B/VGIIb  | -                    | <i>C. deuterogattii</i>                          | TM                         | TM                         | Csb      | TM        | (24) |
| Canada        | Rathrevor Beach Provincial Park, Parksville, B.C.                                                       | 2002           | -124.266  | 49.32096 | 2002          | AFLP6A/VGIIa,<br>AFLP6B/VGIIb  | $\alpha$             | <i>C. deuterogattii</i>                          | TM                         | TM                         | Csb      | TM        | (25) |
| Canada        | Victoria, B.C.                                                                                          | 2002           | -123.369  | 48.43294 | 2002          | AFLP6A/VGIIa                   | -                    | <i>C. deuterogattii</i>                          | TM                         | TM                         | Csb      | TM        | (24) |
| Colombia      | Cali                                                                                                    | 2002-2003      | -75.68333 | 5.0      | 2002          | AFLP6/VGII                     | <b>a</b>             | <i>C. deuterogattii</i>                          | T                          | T                          | Af       | T         | (26) |
| Colombia      | Cúcuta                                                                                                  | 2002-2003      | -72.01667 | 6.933333 | 2002          | AFLP4/VGI<br>AFLP5/VGIII       | $\alpha$             | <i>C. gattii</i> s.s.<br><i>C. bacillisporus</i> | T                          | T                          | Cfb      | TM        | (26) |
|               |                                                                                                         |                |           |          |               | VGIV (AFLP type not specified) |                      | -                                                |                            |                            |          |           |      |
| Colombia      | Bogota                                                                                                  | 2002-2003      | -74.08333 | 4.6      | 2002          | AFLP6/VGII                     | <b>a</b>             | <i>C. deuterogattii</i>                          | T                          | T                          | Cfb      | TM        | (26) |
| Colombia      | Cundinamarca                                                                                            | 2002-2003      | -73.05    | 3.666667 | 2002          | AFLP6/VGII                     | <b>a</b>             | <i>C. deuterogattii</i>                          | T                          | T                          | Am       | T         | (26) |
|               |                                                                                                         |                |           |          |               | VGIV (AFLP type not specified) |                      | -                                                |                            |                            |          |           |      |
| Colombia      | Medellin                                                                                                | 2002-2003      | -73.88333 | 5.433333 | 2002          | AFLP6/VGII                     | <b>a</b>             | <i>C. deuterogattii</i>                          | T                          | T                          | Cfb      | TM        | (26) |
| India         | Jabalpur City (Central India)                                                                           | 2002-2004      | 79.95006  | 23.16697 | 2002          | -                              | -                    | -                                                | T                          | T                          | Csa      | TM        | (27) |
| United States | Lynden, Washington                                                                                      | 2002-2006      | -122.452  | 48.9465  | 2002          | AFLP6A/VGIIa                   | -                    | <i>C. deuterogattii</i>                          | TM                         | TM                         | Cfb      | TM        | (24) |
| Australia     | Mt. Druitt, Sydney, NSW                                                                                 | <2003          | 150.8167  | -33.7667 | 2003          | AFLP4/VGI<br>AFLP6/VGII        | $\alpha$<br>$\alpha$ | <i>C. gattii</i> s.s.<br><i>C. deuterogattii</i> | ST                         | ST                         | Cfa      | TM        | (28) |
| Colombia      | La Calera                                                                                               | 2003           | -73.9693  | 4.72069  | 2003          | -                              | <b>a</b>             | -                                                | T                          | T                          | Cfb      | TM        | (29) |
| Canada        | Saltspring Island, B.C.                                                                                 | 2004-2005      | -123.408  | 48.769   | 2004          | AFLP4/VGI                      | -                    | <i>C. gattii</i> s.s.                            | TM                         | TM                         | Csb      | TM        | (30) |
| Canada        | Hornby Island                                                                                           | 2005           | -124.667  | 49.525   | 2005          | AFLP6A/VGIIa                   | -                    | <i>C. deuterogattii</i>                          | TM                         | TM                         | Csb      | TM        | (24) |
| Argentina     | Resistencia, Chaco                                                                                      | 2006           | -58.9839  | -27.4606 | 2006          | AFLP5/VGIII                    | -                    | <i>C. bacillisporus</i>                          | ST                         | ST                         | Cfa      | TM        | (31) |
| Canada        | Elk Falls Provincial Park, Campbell River                                                               | 2006           | -125.251  | 50.026   | 2006          | -                              | -                    | -                                                | TM                         | TM                         | Cfb      | TM        | (24) |
| Argentina     | Parque España, La Paz, Entre Rios                                                                       | 2007           | -59.6434  | -30.7437 | 2007          | AFLP4/VGI                      | -                    | <i>C. gattii</i> s.s.                            | ST                         | ST                         | Cfa      | TM        | (31) |
| Argentina     | Rosario, Santa Fe                                                                                       | 2007           | -60.6393  | -32.9468 | 2007          | AFLP4/VGI                      | -                    | <i>C. gattii</i> s.s.                            | ST                         | ST                         | Cfa      | TM        | (31) |
| Brazil        | Botafogo district, Rio de Janeiro                                                                       | 2008-2010      | -43.1856  | -22.969  | 2008          | AFLP4/VGI                      | -                    | <i>C. gattii</i> s.s.                            | T                          | T                          | Am       | T         | (32) |
| Colombia      | Cúcuta                                                                                                  | 2008-2009      | -72.51    | 7.913333 | 2008          | AFLP4/VGI<br>AFLP5/VGIII       | <b>a</b><br>$\alpha$ | <i>C. gattii</i> s.s.<br><i>C. bacillisporus</i> | T                          | T                          | Cfb      | TM        | (33) |
| Brazil        | Belem, Para                                                                                             | <2009          | -48.50417 | -1.45556 | 2009          | AFLP6/VGII                     | -                    | <i>C. deuterogattii</i>                          | T                          | T                          | Am       | T         | (34) |
| India         | Guindy National Park, Chennai, South India                                                              | <2009          | 80.21941  | 12.99668 | 2009          | -                              | -                    | -                                                | T                          | T                          | Aw       | T         | (35) |

| Country         | Area                                                                  | Sample year(s) | Longitude | Latitude | Earliest year | Genotype                                            | Mating type         | Species                                        | With $\pm 40^\circ$ limits | With $\pm 35^\circ$ limits | KG label | KG limits | Ref.     |
|-----------------|-----------------------------------------------------------------------|----------------|-----------|----------|---------------|-----------------------------------------------------|---------------------|------------------------------------------------|----------------------------|----------------------------|----------|-----------|----------|
| Italy           | Reggio Calabria (southern Italy)                                      | 2009           | 15.65     | 38.07    | 2009          | AFLP4/VGI                                           | $\alpha$            | <i>C. gattii</i> s.s.                          | ST                         | TM                         | Csa      | TM        | (36)     |
| Puerto Rico     | Guanica Dry Forest                                                    | <2010          | -66.908   | 17.97163 | 2010          | AFLP6/VGII                                          | $\alpha$            | <i>C. deuterogattii</i>                        | T                          | T                          | Aw       | T         | (37)     |
| United States   | Near Silver Falls State Park, Oregon (based on Figure 1 in main text) | 2010–2011      | -122.6336 | 44.90544 | 2010          | AFLP7/VGIV                                          | $\alpha$            | <i>C. tetragattii</i>                          |                            |                            |          |           |          |
|                 |                                                                       |                |           |          |               | AFLP4/VGI, AFLP6A/VGIIa, AFLP6B/VGIIb, AFLP6C/VGIIc | –                   | <i>C. gattii</i> s.s., <i>C. deuterogattii</i> | TM                         | TM                         | Csb      | TM        | (38)     |
| The Netherlands | Berg en Dal                                                           | 2011           | 5.916667  | 51.82167 | 2011          | AFLP4/VGI                                           | $\alpha$            | <i>C. gattii</i> s.s.                          | TM                         | TM                         | Cfb      | TM        | (39)     |
| Tunisia         | Sfax region (southern Tunisia)                                        | <2011          | 10.76028  | 34.74056 | 2011          | –                                                   | $\alpha$            | –                                              | ST                         | ST                         | BSh      | AR        | (40)     |
| United States   | Los Angeles, California                                               | 2011–2012      | -118.244  | 34.05223 | 2011          | AFLP4/VGI                                           | $\alpha$            | <i>C. gattii</i> s.s.                          | ST                         | ST                         | Csb      | TM        | (41)     |
| Botswana        | Francistown                                                           | 2012           | 27.50788  | -21.17   | 2012          | –                                                   | $\alpha$            | –                                              | T                          | T                          | BSh      | AR        | (42)     |
|                 | Gaborone                                                              | 2012           | 25.933    | -24.651  | 2012          | –                                                   | $\alpha$            | –                                              | ST                         | ST                         | BSh      | AR        |          |
|                 | Maun                                                                  | 2012           | 23.415    | -20.007  | 2012          | –                                                   | $\alpha$            | –                                              | T                          | T                          | BSh      | AR        |          |
| Brazil          | Manaus                                                                | 2012–2014      | -60.052   | -3.109   | 2012          | AFLP6/VGII                                          | $\alpha$            | <i>C. deuterogattii</i>                        | T                          | T                          | Af       | T         | (43)     |
| Kenya           | Nairobi                                                               | 2012–2013      | 36.83333  | -1.28333 | 2012          | AFLP4/VGI                                           | –                   | <i>C. gattii</i> s.s.                          | T                          | T                          | Cfb      | TM        | (44)     |
| Spain           | Alicante                                                              | <2012          | -0.48149  | 38.34517 | 2012          | AFLP4/VGI                                           | $\alpha$            | <i>C. gattii</i> s.s.                          | ST                         | TM                         | Bsk      | AR        | (45)     |
| Spain           | Barcelona                                                             | <2012          | 2.158987  | 41.38879 | 2012          | AFLP4/VGI                                           | $\alpha$            | <i>C. gattii</i> s.s.                          | TM                         | TM                         | Csa      | TM        | (45)     |
| Bonaire         | Lagun Goto, Rincon village, Hato village                              | 2013           | -68.3258  | 12.21501 | 2013          | AFLP6/VGII                                          | $\alpha$            | <i>C. deuterogattii</i>                        | T                          | T                          | BSh†     | AR        | (46)     |
| Greece          | Athens                                                                | 2013           | 23.71622  | 37.97945 | 2013          | AFLP4/VGI                                           | $\alpha$            | <i>C. gattii</i> s.s.                          | ST                         | TM                         | Csa      | TM        | (47)     |
| Greece          | Salamina Island                                                       | 2013           | 23.50677  | 37.92189 | 2013          | AFLP4/VGI                                           | $\alpha$            | <i>C. gattii</i> s.s.                          | ST                         | TM                         | Csa      | TM        | (47)     |
| Italy           | Ragalna, Catania                                                      | 2013           | 15.08233  | 37.43505 | 2013          | AFLP4/VGI                                           | $\alpha$            | <i>C. gattii</i> s.s.                          | ST                         | TM                         | Csa      | TM        | (47)     |
| Italy           | Route Brindisi-Fasano                                                 | 2013           | 17.69123  | 40.60921 | 2013          | AFLP4/VGI                                           | <b>a</b>            | <i>C. gattii</i> s.s.                          | TM                         | TM                         | Csa      | TM        | (47)     |
| Italy           | Route Gallipoli-Collepasso                                            | 2013           | 17.99538  | 40.0559  | 2013          | AFLP4/VGI                                           | <b>a</b>            | <i>C. gattii</i> s.s.                          | TM                         | TM                         | Csa      | TM        | (47)     |
| Spain           | El Perello, Tarragona                                                 | 2013           | 0.71335   | 40.87642 | 2013          | AFLP7/VGIV                                          | $\alpha$            | <i>C. tetragattii</i>                          | TM                         | TM                         | Csa      | TM        | (47, 48) |
| Spain           | Campello, Alicante                                                    | 2014           | -0.398    | 38.429   | 2014          | AFLP4/VGI                                           | $\alpha$            | <i>C. gattii</i> s.s.                          | ST                         | TM                         | Bsk      | AR        | (47)     |
| Spain           | Mendivil, Navarra                                                     | 2014           | -1.451    | 42.66366 | 2014          | AFLP4/VGI                                           | $\alpha$            | <i>C. gattii</i> s.s.                          | TM                         | TM                         | Cfb      | TM        | (47)     |
| Brazil          | Santa Isabel do Rio Negro, Amazonas state                             | <2015          | -65.01889 | -0.41417 | 2015          | AFLP6/VGII                                          | $\alpha$ , <b>a</b> | <i>C. deuterogattii</i>                        | T                          | T                          | Af       | T         | (49)     |
| Thailand        | Queen Sirikit Botanic Garden, Chiang Mai Province                     | <2016          | 98.86     | 18.89953 | 2016          | AFLP4/VGI                                           | –                   | <i>C. gattii</i> s.s.                          | T                          | T                          | Aw       | T         | (50)     |

\*For longitude, positive numbers refer to degrees east of the prime meridian and negative numbers refer to degrees west of the prime meridian. For latitude, positive numbers refer to degrees north of the equator and negative numbers refer to degrees south of the equator. The latitudinal boundaries of  $\pm 40^\circ$  and  $\pm 35^\circ$  refer to degrees north (+) and south (-) of the equator. For each isolation, we recorded the country and area of isolation, the range of years when the isolations were collected (if the earliest year yielding positive isolations was provided, this would be the start of the range), the coordinates where the isolation was found, the earliest possible year of collection recorded for this analysis, and the climate classifications for each isolation, as designated by solar definitions with  $\pm 40^\circ$  and  $\pm 35^\circ$  limits as well as by the KG system. Genotype (including subtype), mating type, and species (51) are also provided, if specified by the study. It is important to note that some studies have only used phenotypic methods (e.g., CGB agar) to differentiate *C. gattii* sensu lato from *C. neoformans* s.l. This is, however, not always a reliable method. Thus, data from this list need to be interpreted with caution. AR, arid; B.C., British Columbia; KG, Köppen-Geiger; NSW, New South Wales; QLD, Queensland; ref., reference; SA, South Australia; ST, subtropical; T, tropical; TM, temperate; WA, Western Australia.

†The KG system does not classify the island of Bonaire (Dutch Caribbean) in its map of observed climates during 1976–2000. We, therefore, obtained the classification of Bonaire from (52) in addition to our own categorization using the KG climate classification criteria (53) and present-day climate averages of the island (<https://www.ncdc.noaa.gov/>).

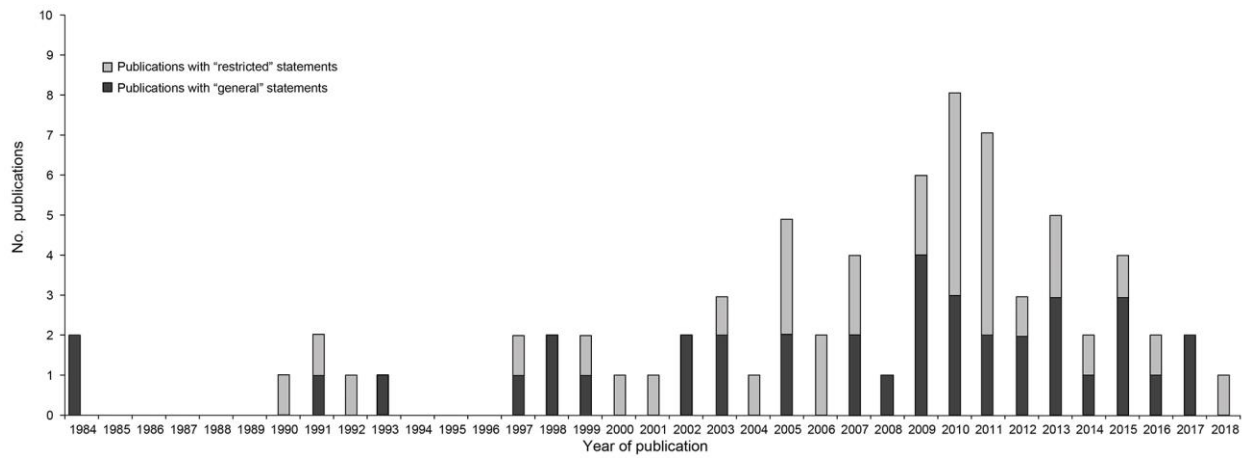

**Appendix Figure.** Publications from 1984 through November 2018 discussing pre-1999 areas of endemicity of *Cryptococcus gattii* (n = 73). Publications containing statements claiming *C. gattii* was strictly found in tropical and subtropical areas before the 1999 Vancouver Island outbreak were labeled as “restricted” (n = 35), while those containing statements that also acknowledged other areas of endemicity before the 1999 Vancouver Island outbreak were labeled as “general” (n = 38).
